# Supplementary material for: Comparative Expression Profiling Reveals the Regulatory Effects of Dietary Mannan Oligosaccharides on the Intestinal Immune Response of Juvenile Megalobrama amblycephala against Aeromonas hydrophila Infection
Source: MDPI journal article supplement (doi:10.3390/ijms24032207), 2023-01-22
Supplement: s1 [file s1]

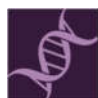

**Supplementary Table S1.** Ingredients and nutrient composition of the experimental diets.

| Ingredients                                      | Control (%) | MOS200 (%) | MOS400 (%) |
|--------------------------------------------------|-------------|------------|------------|
| Fish meal                                        | 8.00        | 8.00       | 8.00       |
| Soybean meal                                     | 20.80       | 20.80      | 8.00       |
| Cottonseed meal                                  | 15.00       | 15.00      | 15.00      |
| Rapeseed meal                                    | 18.00       | 18.00      | 15.00      |
| Wheat middling                                   | 30.00       | 30.00      | 30.00      |
| Soybean oil                                      | 5.00        | 5.00       | 5.00       |
| Ca(H <sub>2</sub> PO <sub>4</sub> ) <sub>2</sub> | 2.00        | 1.98       | 1.96       |
| MOS                                              | -           | 0.02       | 0.04       |
| Choline                                          | 0.30        | 0.30       | 0.30       |
| Vitamin premix <sup>1)</sup>                     | 0.40        | 0.40       | 0.40       |
| Mineral premix <sup>2)</sup>                     | 0.50        | 0.50       | 0.50       |
| Total                                            | 100         | 100        | 100        |
| Nutrient levels <sup>3)</sup>                    |             |            |            |
| Moisture                                         | 6.88        | 6.89       | 6.91       |
| Crude protein                                    | 37.10       | 36.78      | 36.91      |
| Crude lipid                                      | 8.43        | 8.41       | 8.28       |
| Ash                                              | 7.50        | 7.51       | 7.51       |

1) Vitamin premix for each kg of feed: VE 50 mg, VA 5 000 IU, VB1 8 mg, VK 5 mg, VB6 8 mg, VD 2 000 IU, VB2 10 mg, Pantothenic acid 30 mg, VB12 0.03 mg, Folic acid 3 mg, Niacin 30 mg, inositol 100 mg, biotin 0.4 mg, VC 180 mg.

2) Mineral premix for each kg of feed: Mg 300 mg, Zn 150 mg, Fe 170 mg, Co 0.25 mg, Cu 4 mg, Mn 22 mg, Se 0.4 mg.

3) Moisture, crude protein, crude lipid and ash contents were Calculated values.
